# Supplementary material
Source: PubMed Central journal article supplement (PMC3237871)
Supplement: NIHMS324797-supplement-1.pdf [file NIHMS324797-supplement-1.pdf]

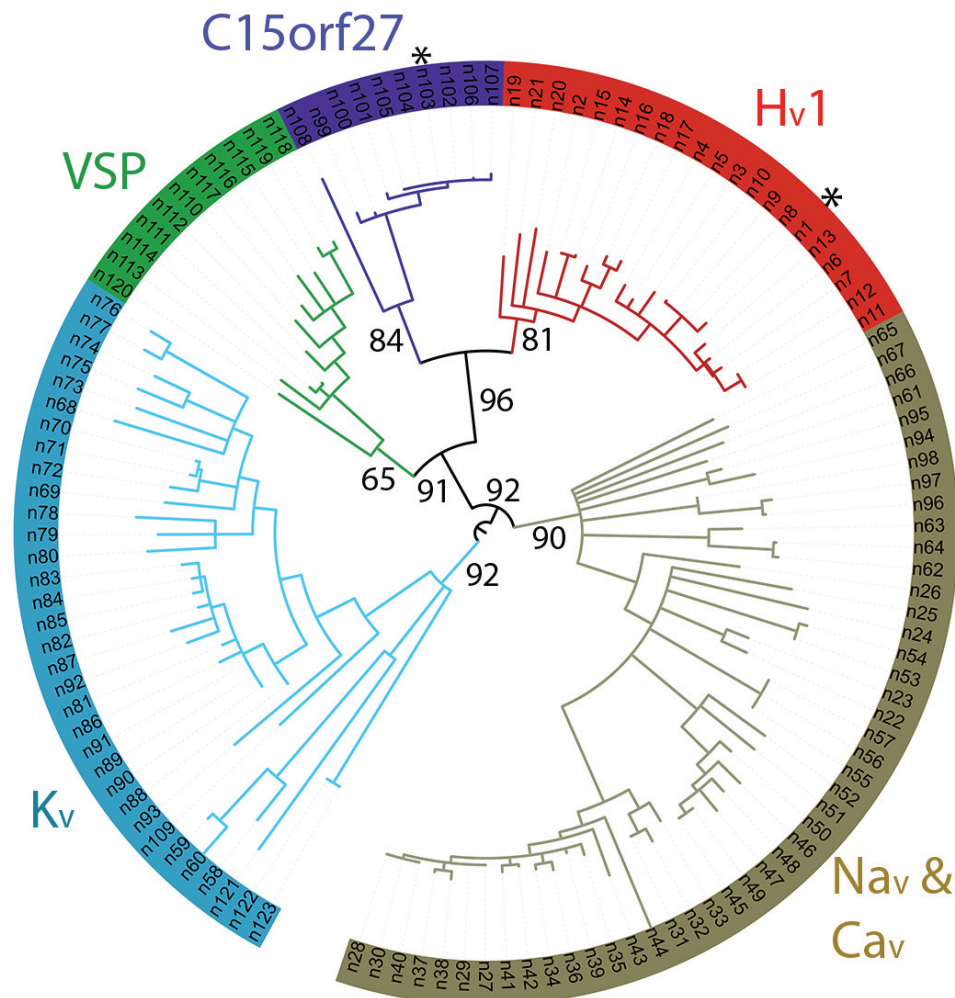

**Supplementary Figure S1. Phylogenetic relationship between the proton channel (H<sub>V</sub>1) and C15orf27 families and other VSD-containing proteins.**

Unrooted phylogram from a maximum likelihood analysis of 122 VSDs (Table S1) shows that H<sub>V</sub>1 sequences appear on a branch distinct from other VSDs. Sequences are colour coded: K<sub>V</sub> = voltage gated potassium channel; Na<sub>V</sub> = voltage gated sodium channel; Ca<sub>V</sub> = voltage gated calcium channel; VSP = voltage sensitive phosphatase. Notably, the VSD homologs separate into three main branches, indicating that the VSDs of the H<sub>V</sub>1/C15orf27/VSP group are phylogenetically distinct from VSDs of both K<sub>V</sub> and also Na<sub>V</sub> and Ca<sub>V</sub> channels. Phylogenetic analysis was performed on VSD sequences only, and did not include sequences of channel pores. Branches with likelihood support values (a measure of confidence in a branch's appearance in a tree) <0.50 were collapsed. The range of support values shown is representative of the full range of all (non-collapsed) branches. \*indicates hH<sub>V</sub>1 and C15orf27 sequence positions.

**Supplementary Figure S2. The c15orf27 protein localizes to the plasma membrane.**

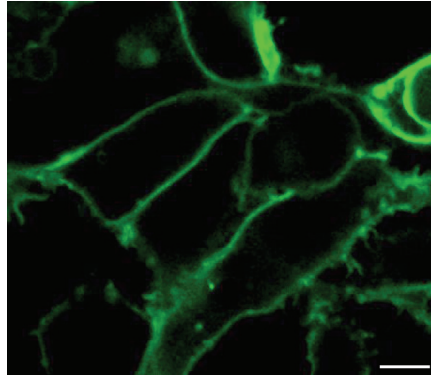

Human C15orf27 cDNA was subcloned into pEGFPN1 vector (Clontech, CA) with GFP fused to the C-terminus of the cDNA. HEK cells were transfected with C15orf27-GFP and mid-plane images were obtained 24 hours post-transfection by Laser scanning confocal microscopy. Scale bar is 5  $\mu$ m.

**Supplementary Figure S3. GFP-tagged constructs appear to localize to the plasma membrane.**

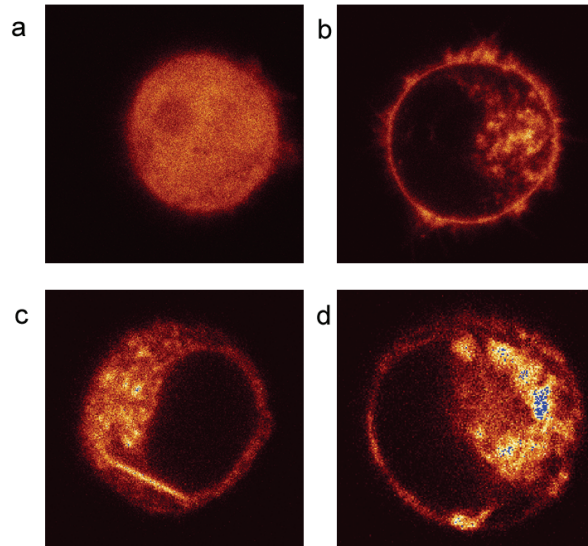

Pseudocolour images of GFP in representative COS-7 cells transfected with (a) GFP alone, (b) WT hH<sub>v</sub>1 with GFP tag, (c) D112S with GFP tag, or (d) D112V with GFP tag. GFP alone is diffusely distributed throughout the cytoplasm. GFP-tagged hH<sub>v</sub>1 constructs appear in the membrane and in intracellular compartments.

**Methods** - Transfected cells were cultured in 2 ml culture dishes in DMEM. The medium was removed by aspiration and the cells were detached by immersing monolayers in trypsin/EGTA solution (Sigma) for 3 min. Cells were washed in DMEM medium and suspended at a concentration of  $2 \times 10^6$  cells/ml. An aliquot of the cell suspension was added to a measuring chamber containing 300  $\mu$ l of Ringer's solution and cells were allowed to settle. Transfected cells were visualized by exciting at 488 nm and collecting emission at 490 - 560 nm using a Leica TCS SP2 confocal system (Leica Microsystems, Exton, PA, USA). Cells were imaged using the 40x water immersion lens and scanned at 400 Hz.

**Supplementary Figure S4. The elimination of  $Zn^{2+}$  sensitivity by the H140A/H193A mutation does not detectably impair proton selectivity.**

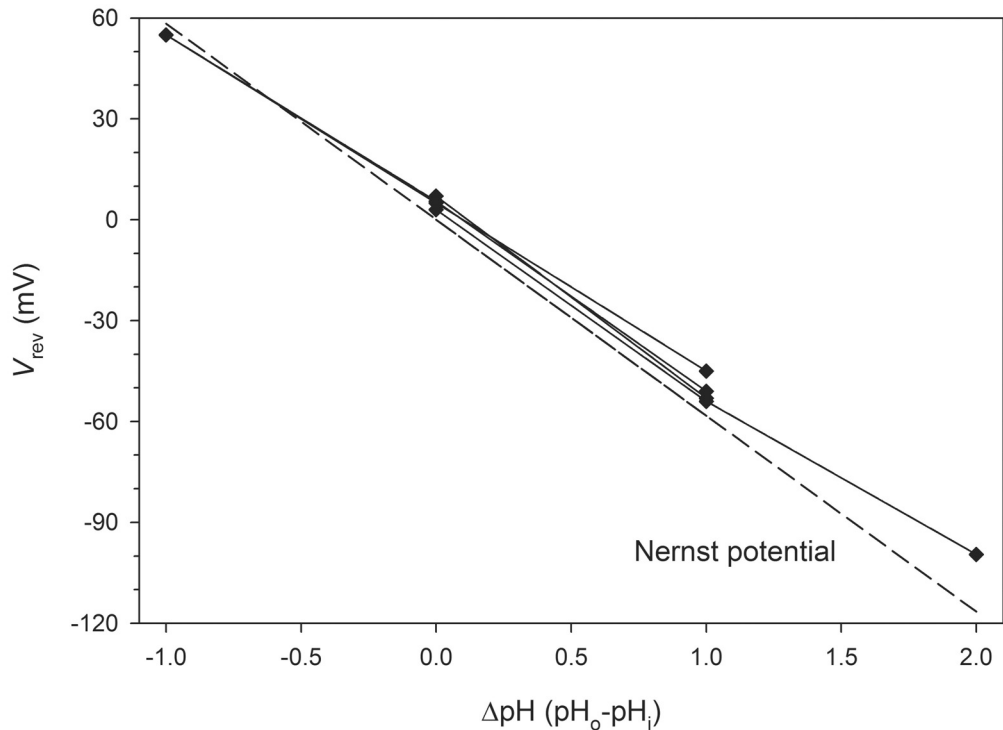

In inside-out patches of membrane from HEK-293 cells expressing H140A/H193A channels,  $V_{rev}$  was measured over a range of pH. Measurements in the same patch are connected by lines. This double mutant was used as a background for several of the Asp<sup>112</sup> mutants in order to validate that any currents detected were due to the mutant channel, rather than native proton currents. In the presence of 100  $\mu M$   $Zn^{2+}$ , WT proton current activation is slowed  $\sim 15$ -fold, and the  $g_H$ - $V$  relationship is shifted positively by  $\sim 60$  mV<sup>1</sup>. The H140A/H193A mutation nearly eliminates inhibition by  $Zn^{2+}$  (refs. <sup>2,3</sup>).

#### References

1. Cherny, V. V. & DeCoursey, T. E. pH-dependent inhibition of voltage-gated  $H^+$  currents in rat alveolar epithelial cells by  $Zn^{2+}$  and other divalent cations. *J Gen Physiol* **114**, 819-38 (1999).
2. Musset, B. et al. Zinc inhibition of monomeric and dimeric proton channels suggests cooperative gating. *J Physiol* **588**, 1435-49 (2010).
3. Ramsey, I. S., Moran, M. M., Chong, J. A. & Clapham, D. E. A voltage-gated proton-selective channel lacking the pore domain. *Nature* **440**, 1213-6 (2006).

**Supplementary Figure S5. Mutation of Asp<sup>112</sup> does not eliminate the  $\Delta$ pH dependence of gating.**

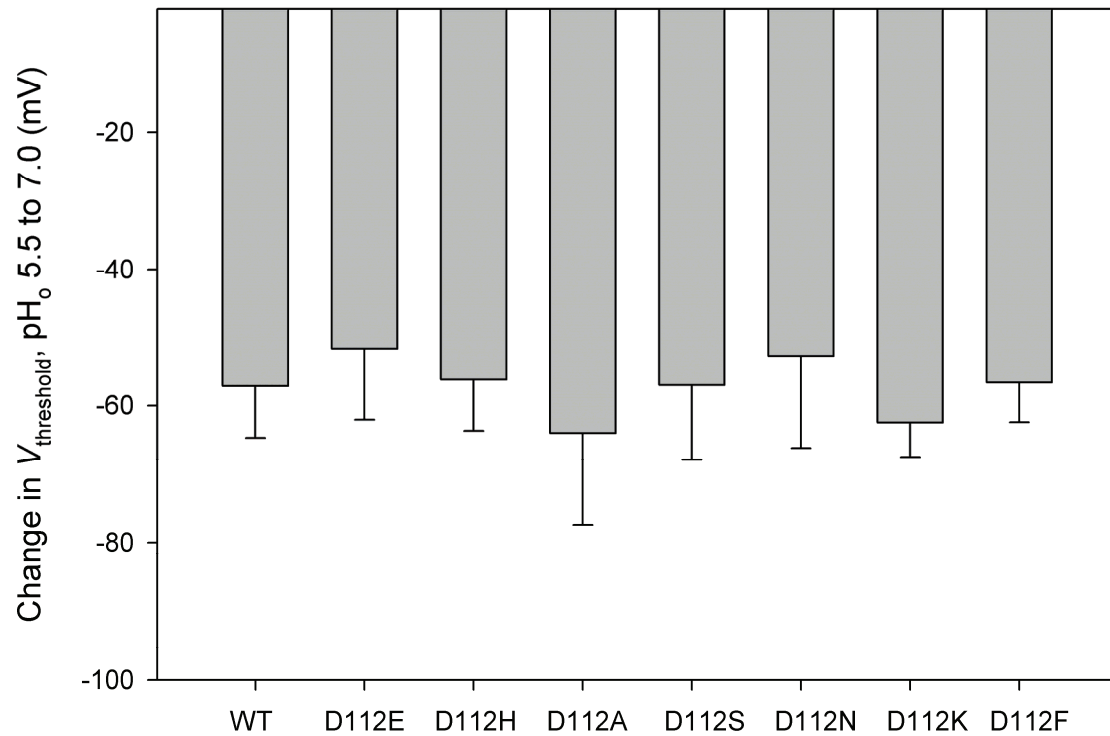

In whole-cell measurements like those in Fig. 2,  $V_{\text{threshold}}$  was estimated as the voltage at which distinct conductance was activated, usually determined from tail currents, which are more sensitive. The graph shows the mean  $\pm$  SD shift of  $V_{\text{threshold}}$  when pH<sub>o</sub> 5.5 and 7.0 are compared, both at pH<sub>i</sub> 5.5. Numbers of cells range 3 to 11. None of the shifts for D112x mutants differed significantly from that in WT ( $p > 0.28$  for each).

**Supplementary Figure S6. Dilution of ionic strength with isotonic sucrose reveals that most Asp<sup>112</sup> mutants are anion selective.**

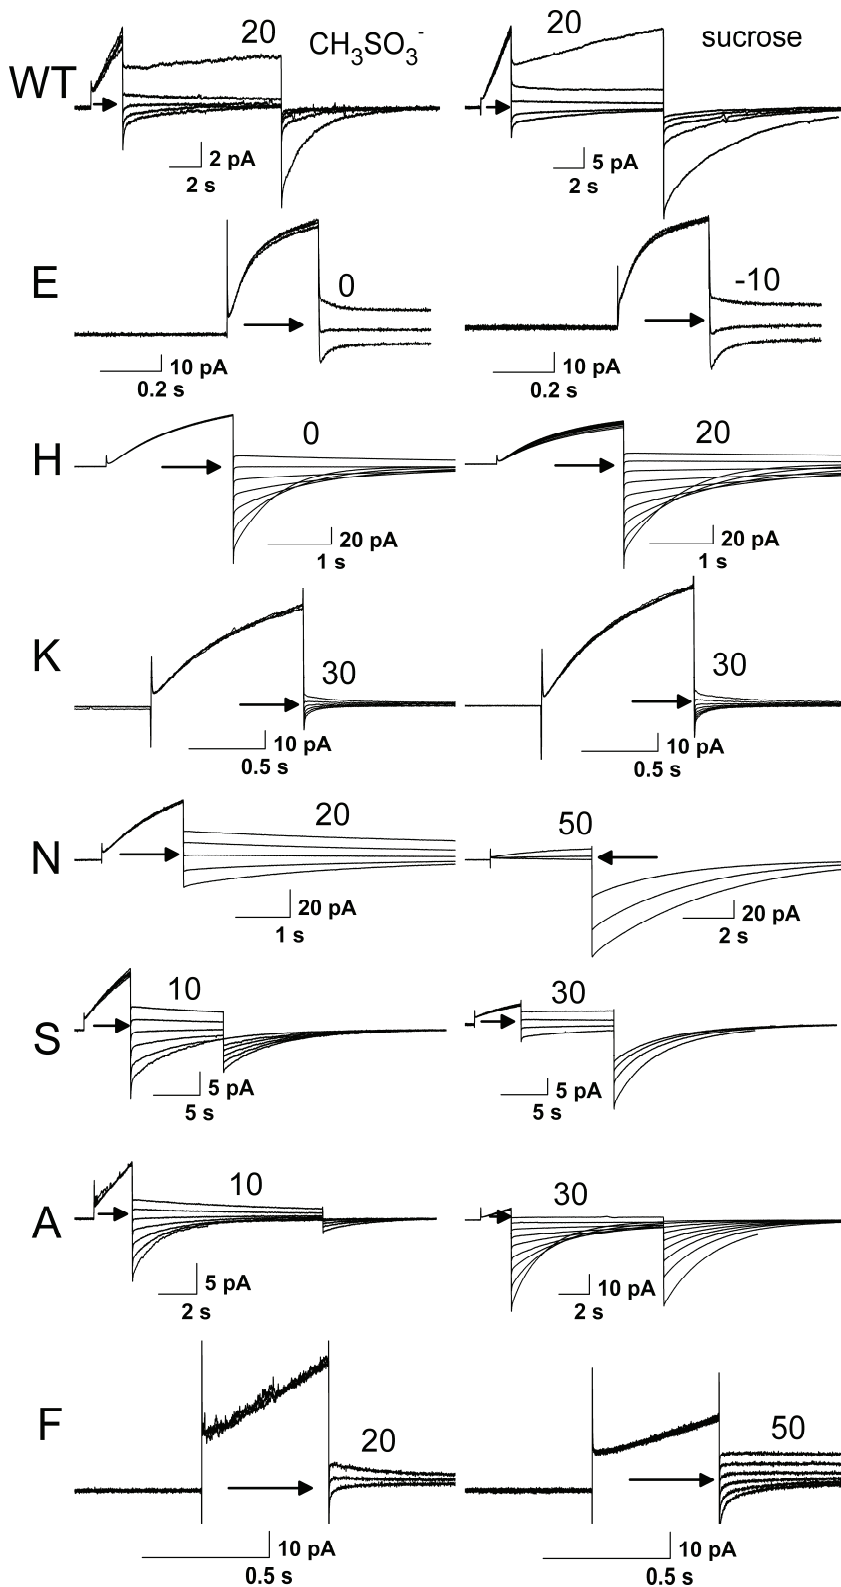

Measurement of  $V_{\text{rev}}$  by tail currents (or direct reversal of test current in D112N in sucrose) at pH 5.5//5.5 ( $\text{CH}_3\text{SO}_3^-$  solutions) is shown in the first column, and in the same cell after 90% dilution of the bath by isotonic sucrose in the second column. Arrows indicate zero current. Letters indicate the amino acid substituted at position 112. The most positive voltage in each series is given, without correction for liquid junction potentials.  $V_{\text{rev}}$  of WT or D112E channels did not change, consistent with proton selectivity. For other mutants, except D112K,  $V_{\text{rev}}$  shifted positively, indicating anion selectivity.  $V_{\text{hold}}$  was -40 mV, or -20 mV for F.  $V_{\text{pre}}$  for control, sucrose was 30, 30 mV (WT); 20, 10 mV (E); 60, 60 (H); 140, 140 mV (K); 60 mV (N); 50, 40 mV (S); 50, 50 mV (A); and 100, 90 mV (F). The lack of a shift for D112K in  $\text{CH}_3\text{SO}_3^-$  at pH<sub>o</sub> 5.5 is anomalous, because sucrose did produce a positive shift at pH<sub>o</sub> 5.5 in  $\text{Cl}^-$  solution, and at pH<sub>o</sub> 7.0 in both  $\text{Cl}^-$  and  $\text{CH}_3\text{SO}_3^-$  solutions (Fig. 3).

**Supplementary Figure S7. Maximum conductance of Asp<sup>112</sup> mutants expressed in COS-7 cells, at pH 5.5/5.5, normalized to capacity.**

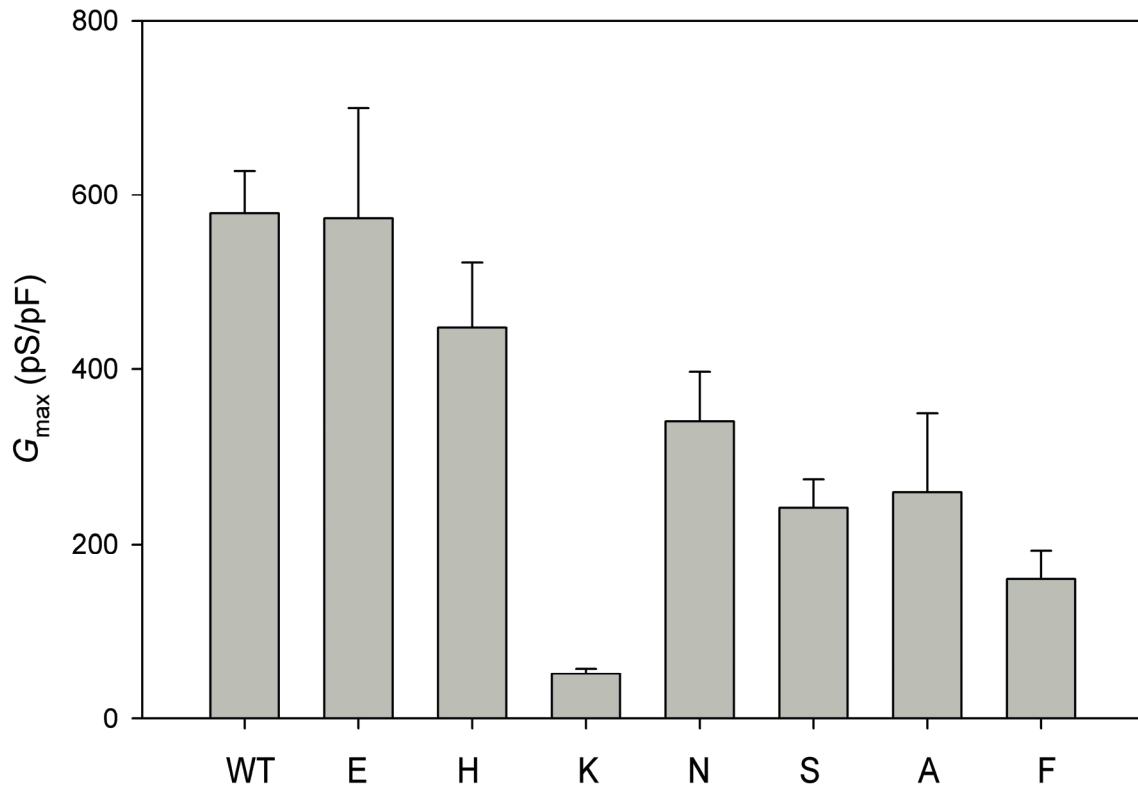

The maximum chord conductance  $G_{\max}$  was calculated from the maximum current measured in each cell, using  $V_{\text{rev}}$  measured in the same solution. Mean of 8-14 cells for each mutant, with s.e. bars.

**Supplementary Figure S8. Mutation of Asp<sup>185</sup> does not impair proton selectivity.**

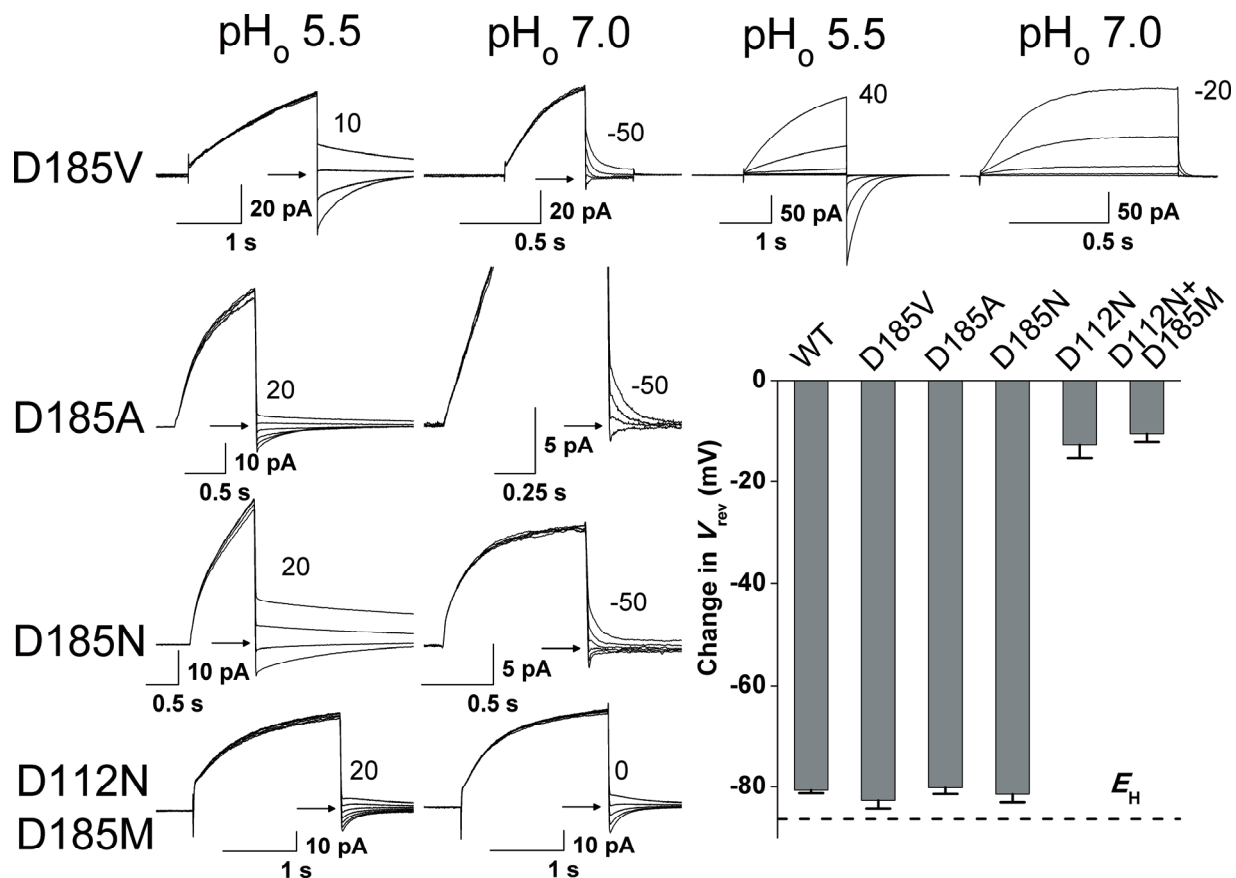

In whole-cell measurements like those in Fig. 2,  $V_{rev}$  was determined from tail currents at pH<sub>o</sub> 5.5 and pH<sub>o</sub> 7.0, both at pH<sub>i</sub> 5.5, as illustrated here. Families of currents are shown for D185V at pH<sub>o</sub> 5.5 and 7.0. The most positive voltage for tail currents or for families of pulses in 10 mV increments is labelled. For D185V tail currents,  $V_{hold}$  was -40 mV and  $V_{pre}$  was +30 mV at pH<sub>o</sub> 5.5,  $V_{hold}$  was -60 mV and  $V_{pre}$  was -30 mV at pH<sub>o</sub> 7.0. For families,  $V_{hold}$  was -40 mV and -70 mV at pH<sub>o</sub> 5.5 or pH<sub>o</sub> 7.0, respectively. For D185A,  $V_{hold}$  was -60 mV for both pH and  $V_{pre}$  was +75 or +15 mV, respectively, for pH<sub>o</sub> 5.5 and pH<sub>o</sub> 7.0. For D185N,  $V_{hold}$  was -60 mV for both pH and  $V_{pre}$  was +45 or -31 mV, respectively, for pH<sub>o</sub> 5.5 and pH<sub>o</sub> 7.0.

To determine whether the addition of Asp<sup>185</sup> neutralization to an anion selective Asp<sup>112</sup> mutant might produce additional effects, we also studied the double mutant D112N/D185M. Tail currents at pH<sub>o</sub> 5.5 and pH<sub>o</sub> 7.0 are shown, with  $V_{hold}$  -40 mV and  $V_{pre}$  +100 or +60 mV at pH<sub>o</sub> 5.5 and pH<sub>o</sub> 7.0, respectively.

The bar graph shows the change in  $V_{rev}$  when pH<sub>o</sub> was changed from 5.5 to 7.0 for these Asp<sup>185</sup> mutants. For comparison, values from WT and D112N channels from Fig. 2b are replotted here. There is no difference between WT and D185V ( $n = 4$ ), D185A ( $n = 4$ ), or D185N ( $n = 4$ ) or between D112N and D112N/D185M ( $n = 6$ ).



**Supplementary Figure S9. Dissociation of the relationship between  $V_{rev}$  and the  $g$ - $V$  relationship in Asp<sup>112</sup> mutants.**

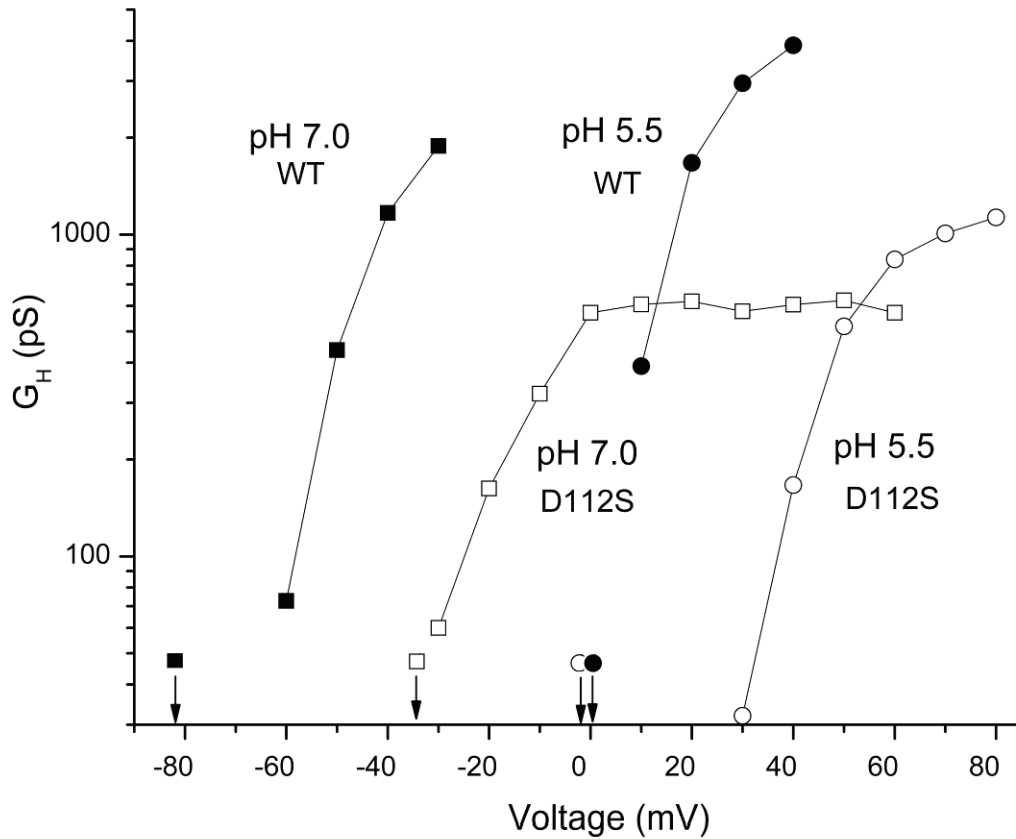

For representative cells expressing WT hH<sub>V</sub>1 (solid symbols) and D112S channels (open symbols), the conductance was calculated from the current amplitude extrapolated from a rising exponential fit, using  $V_{rev}$  measured in the relevant solution at pH<sub>o</sub> 5.5 or pH<sub>o</sub> 7.0, all at pH<sub>i</sub> 5.5. The arrows indicate measured  $V_{rev}$  values. In both D112S and WT, the  $g$ - $V$  relationship shifted negatively by ~60 mV at pH<sub>o</sub> 7.0 compared to its position at pH<sub>o</sub> 5.5, but  $V_{rev}$  shifted much less in D112S than in WT. In WT hH<sub>V</sub>1, there is a linear relationship between  $V_{rev}$  and  $V_{threshold}$  (or the  $g_H$ - $V$  relationship) with a slope of ~40 mV/unit increase in  $\Delta$ pH<sup>1</sup>.

<sup>1</sup> Musset, B. *et al.* Detailed comparison of expressed and native voltage-gated proton channel currents. *J. Physiol.* **586**, 2477-2486(2008).

### Supplementary Table 1. FASTA-formatted alignment of voltage sensor domain sequences.

This alignment was used to generate the phylogenetic tree in Fig. S1. Sequences are numbered as in the tree. One sequence from a protein that responds to hyperpolarizing potentials (109) was included. All other sequences were from protein families known to respond to depolarizing potentials, or from C15orf27 homologs. Accession numbers used are from NCBI (gi), Uniprot (uniprot or sp), or PDB (pdb) sequence databases.

```
>1 homo_hvcn1 gi|91992153|
RKLfSS-----HRFQVIIICLVVLDALLVLAELILDkL-----IIQ-
-----PDK----NNYAAMV----FHYMSITILVFFM
MEIIFKLFVFR-----LEFFHhKFEILDavvvvVsfILDIVLLFQEH---
-----QFE-ALGllLILLRLWRVARIINGI----IISV-
KTRSERQLLRLKQ
>2 gallus_hvcn gi|71897219|
KKLfSS-----RRFQIVIVFLVIVDALLVLGELLMdLk-----IIH-
-----PDK----YHIAPKV----FHYLSLSILTIFL
VEVGFKIFVYG-----REFFHhKFEVLDSIVVVVsfILDIVLLFReH---
-----EFE-AVGLLILLRLWRVARIINGI----ILSV-
KTRSEQQVSKLkQ
>3 opossum_hvcn gi|12632423|
RKLfGS-----HRFQVIIICLVIMDALLVLAELMLdLk-----IIQ-
-----PDK----DNyAARV----FHYLSIAILTFFM
IEVALKLYVFR-----LEFFYhKFEILDavivIISFVLDIVLLFQEH---
-----AFE-ALGllLILLRLWRVARIINGI----IISV-
KTRSERQLSRLkL
>4 rat_hvcn1 |gi_109497399|
RKLfSS-----HRFQVIIICLVVLDALLVLAELLLdLr-----IIE-
-----PDL----SKYSTKV----FHYLSLAILAFFV
LEISLKVfVFR-----LEFFHhKFEILDAIVVVVsfVLDLILLFKNH---
-----HFE-ALGllLILLRLWRVARIINGI----IISV-
KTRSERQILRLkQ
>5 equus_hvcn1 gi|194214323|
RKLfSf-----HRFQVIIICLVILDALLVLAELILDkL-----IIE-
-----ADK----NNYVPRV----FHYMSLAILTFFM
TEVSLKIFVFR-----LEFFHhKFEILDavvvvVsfVLDIVLIFReH---
-----EFE-ALGllLILLRLWRVARIINGI----IISV-
KTRSERQLLRLKQ
>6 bos_hvcn1 gi|119909285|
RKLfSf-----HRFQVIIICLVVLDALLVLAELVLDkL-----IIE-
-----PDK----NNYAPKV----FHYMSLAILTFFM
MEIFFKIFVFR-----LEFFHhKFEILDTIVVVISfILDIVLLFReH---
-----QFE-ALGllLILLRLWRVARIINGI----IISV-
KTRSERQLLRLKQ
>7 sus_hvcn1 gi|194042948|
RKLfSf-----HRFQVIIICLVILDALLVLAELVLDkL-----IIQ-
-----PDK----NNYANRV----FHYMSVAILTFFM
MEIFFKIFVFR-----FEFFHhKFEILDAIVVVVsfILDVLLFReH---
-----EFE-ALGllLILLRLWRVARIINGI----IISV-
KTRSERQLLRLKQ
>8 macaca_hvcn_4 gi|109098724|
RKLfSS-----HRFQVIIICLVVLDTLVLAELILDkL-----IIQ-
-----PDK----KNYAAMI----FHYMSIAILALFM
MEITFKLFVFR-----LEFFHhKFEILDavvvvVsfVLDVLLFQEH---
-----EFE-ALGllLILLRLWRVARIINGI----IISV-
KTRSERQLLRLKQ
>9 macaca_hvcn gi|109098722|
RKLfSS-----HRFQVIIICLVVLDTLVLAELILDkL-----IIQ-
-----PDK----KNYAAMI----FHYMSIAILALFM
```

MEITFKLQVFR-----LEFFHHKFEILDAVVVVVSVFLDVVLLFQEH---  
-----EFE-ALGLLILLRLWRVARI INGI-----IISV-  
KTRSERQLLRLKQ  
>10 macaca\_hvcn1 gi|10909872|  
-----EVIICLVVLDLTLVLAELILDLR-----IIQ-  
-----PDK----KNYAAMI----FHYMSIAILALFM  
MEITFKLQVFR-----LEFFHHKFEILDAVVVVVSVFLDVVLLFQEH---  
-----EFE-ALGLLILLRLWRVARI INGI-----IISV-  
KTRSERQLLRLKQ  
>11 dog\_hvcn1 gi|73994604|  
RKLQSS-----HRFQVVIICLVILDALLVLAELILDK-----IIQ-  
-----GDK----NNYATKV----FHYSSFAILTLFM  
MEVFLKLVFR-----LEFFHHKFEILDTFVVVVVSFILDVLLFQKH---  
-----EFE-ALGLLILLRLWRVARI INGI-----IISV-  
KTRSERQLLRLKQ  
>12 dog\_hvcn1 gi|73994606|  
RKLQSS-----HRFQVVIICLVILDALLVLAELILDK-----IIQ-  
-----GDK----NNYATKV----FHYSSFAILTLFM  
MEVFLKLVFR-----LEFFHHKFEILDTFVVVVVSFILDVLLFQKH---  
-----EFE-ALGLLILLRLWRVARI INGI-----IISV-  
KTRSERQLLRLKQ  
>13 mus\_hvcn1 gi|109809757|  
RKLQSS-----HRFQVVIICLVILDALLVLAELLLDLK-----IIE-  
-----PDE----QDYAVTA----FHYMSFAILVFFM  
LEIFFKLVFR-----LEFFHHKFEILDAFVVVVVSVFLDLVLLFKSH---  
-----HFE-ALGLLILLRLWRVARI INGI-----IISV-  
KTRSERQILRLKQ  
>14 xenopus\_t\_hvcn1 gi|58332220|  
KWLQSS-----HKFQVVIICLVILDALFVLVEVLLDLE-----LLA-  
-----EKV----DHIPEI----FHYLSISVLSFFI  
LEIAGKLYAFR-----LEFFHHKFEVFDAAIVVISFI IDIVYISRED---  
-----IFN-AVGLLILLRLWRVARI VNGI-----IVSV-  
KTQAEKIHRLKE  
>15 xenopus\_l\_hvcn1 gi|148235789|  
148235  
KWLQSS-----HKFQVVIICLVILDALFVLVEVLLDLE-----LLA-  
-----EKV----DHIPEI----FHYLSISVLTFFI  
LEIAGKLYAFR-----LEFFHHKFEVFDAAIVVISFI IDIVYISRED---  
-----IFN-AVGLLILLRLWRVARI VNGV-----IVSV-  
KTRAEKMHKLKE  
>16 danio\_hvcn1 gi|50539752|  
RKLQST-----ERFQIVVCLVLDALFVLCELLIDLS-----IIE-  
-----ADH----HRIAPQV----FHYLSLALLTFFM  
VELAGKIFAYR-----LEFLHHKFEVFDGIVVVVSFILDIIYISKED---  
-----AFD-AMGLLILLRLWRVARI INGI-----LQSV-  
QNRANHRVEKLKE  
>17 tetraodon\_hvcn1 gi|47209646|  
KQMYCS-----ERFQILVVCLVILDALFVLVELLLDLS-----IIK-  
-----LDH----GSVAPEV----FHFLSLGLVVFFL  
LELAGKLVAFR-----KEFFDHKFEVFDGLVVTVSFVLDVAFIFHED---  
-----AFD-GIGLLILLRLWRVARI INGI-----LQSV-  
KTREQQLHKLKE  
>18 takifugu\_hvcn1 ENSEMBL UPI00016E3E8E  
KWLQCS-----DRFQVLVVCLVILDALFVLVELLLDLS-----IIK-  
-----LDH----GNVPEV----FHYLSLALVTFFV  
VELVGLVAFR-----KEFFDHKFEVFDGLVVVVVSFVLDVAFIFRED---  
-----AFD-GIGLLILLRLWRVARI INGI-----LQSV-  
KTREQQLHKLKE  
>19 nematostella\_hvcn gi|156364735|  
CEIIHG-----QKAQYTIIALVIIDCIIVIAELLVDLE-----ILK-  
-----VHH----DNPAPHI----LHDVSIAILSLFI

IELIVKIYAMG-----MEFFHHKLEVFDGIVVIVSFALDIAFSGGNAAE-  
-----GASLLIILRLRWRVTRIVNGI----ILSV-  
KMQDEKKIHHLHK  
>20 ciona\_hvcn |gi\_118344228|

RHILHS-----KPIHVAIIVLVVLDLDFLVVGGELLIDLK-----VII-  
-----VPH----GNPAPEI----LHGFSLSLILSIFM  
VEIALKIIADH-----RHFIIHKKVEVLDAVVVVISFGVDIALIFVGES--  
-----EALA-AIGLLVILRLRWRVFRINGI----IVTV-  
KTKADDRVHEIKK

>21 trichoplex\_hvcn1 gi|196002093|  
RQLIYS-----HKVHIAIVVLVILDALIVIAELLIDLK-----VIK-  
-----VHH----TSPLARA----FHFTSIAILAIIFL  
VEIVLKLKLYASD-----LAFFLHYFEVFDALIVIVSFVLDIA---YSNS--  
-----EALS-GVGLLVVLRRLRRIARIVNGI----ISSV-  
KSQANDKIHHL--

>22 human\_CACNA1E\_repeat\_3 gi|53832005|  
HYIVNL-----RYFEMCILLVIAAASSIALAAEDPVL-----  
-----NSERNKV----LRYFDYVFTGVFT  
FEMVIKIDQGLIL-----QDGSYFRDLWNILDFVVVVGALVAFALANALGTN--  
-----KGRDIK-TIKSLRVLRLRPLKTIKRL-----PKL-  
KAVFDCVVTSLKN

>23 drosophila\_CAC1A\_repeat\_3 gi|24641459|  
HWVVNL-----PYFDFDFIMVVISMSIALAAEDPVRE-----  
-----NSRRNKI----LNYFDYAFTGVFT  
IEMLLKIVDLGVIL-----HPGSLREFWNIMDAVVVICAAVSFGFDMMSGSSA--  
-----GQNLK-TIKSLRVLRLRPLKTIKRV-----PKL-  
KAVFDCVVTSLKN

>24 mouse\_CAC1H\_repeat\_1 gi|254826786|  
LRLVCN-----PWFEHISMLVIMLNCVTLGMFRPCEDV-----  
-----ECRSERCSI----LEAFDDFIFAFFA  
VEMVIKIVALGLF-----GQKCYLGDWTNRDLDFVIMAGMMEYSLDGHNV---  
-----SLSAIRTVRVLRPLRAINRV-----PSM-  
RILVTLTLLDTLPM

>25 homo\_CAC1I\_repeat\_1 gi|51093859|  
IKMVCN-----PWFEFVSMVLVILLNCVTLGMYQPCDDM-----  
-----DCLSDRCKI----LQVFDDFIFIFFA  
MEMVLKIVALGIF-----GKKCYLGDWTNRDLDFVIMAGMVEYSLDLQNI---  
-----NLSAIRTVRVLRPLKAINRV-----PSM-  
RILVTLTLLDTLPM

>26 homo\_CAC1G\_repeat3 sp\_043497  
HRIITH-----KMFHDVVLVIIIFLNCITIAMERPKIDP-----  
-----HSAERIF----LTLNYSNYIFTAVFL  
AEMTVKVVVALGWCF-----GEQAYLRSSWNVLDGLLVLISVIDILVSMVSDSG--  
-----TKILG-MLRVLRLLRTRLRPLRVISRA-----QGL-  
KLVVETLMSSSLKP

>27 gallus\_SCN1A\_repeat1 uniprot\_E1C4S3  
IKILVH-----SLFSMLIMCTILTNCVFMTMSN-----  
-----PPDW----TKNVEYTFGTGIYT  
FESLIKILARGFCL-----EDFTFLRDPWNWLDFTVITFAYVTEFVNLG-----  
-----NVSALRTFRVLRALKTISVI-----PGL-  
KTIVGALIQSVKK

>28 rat\_SCN2A\_repeat1 sp\_P04775  
IKILVH-----SLFNVLIMCTILTNCVFMTMSN-----  
-----PPDW----TKNVEYTFGTGIYT  
FESLIKILARGFCL-----EDFTFLRNPWNWLDFTVITFAYVTEFVNLG-----  
-----NVSALRTFRVLRALKTISVI-----PGL-  
KTIVGALIQSVKK

>29 mouse\_SCN1A\_repeat1 uniprot\_A2APX8  
IKILVH-----SLFSMLIMCTILTNCVFMTMSN-----

-----PPDW----TKNVEYTFTGIYT  
FESLIKILARGFCL-----EDFTFLRDPWNWLDFTVITFAYVTEFVDLG-----  
-----NVSALRTFRVLRALKTISVI-----PGL-  
KTIVGALIQSVKK  
>30 mouse\_SCN1A\_repeat1\_uniprot\_A2APX7  
IKILVH-----SLFNVLIMCTILTNCVFMMSN-----  
-----PPDW----TKNVEYTFTGIYT  
FESLIKILARGFCL-----EDFTFLRDPWNWLDFTVITFAYVTEFVNLG-----  
-----NVSALRTFRVLRALKTISVI-----PGL-  
KTIVGALIQSVKK  
>31 rat\_SCN11A\_repeat1\_sp\_O88457  
IRISVH-----SVFSMFIICTVIINC MFMAN-----  
-----SMERS-FDNDIPEYVFIGIYI  
LEAVIKILARGFIV-----DEFSFLRDPWNWLD FIVIGTAIATCFPGSQV-----  
-----NLSALRTFRVFRALKAISVI-----SGL-  
KVIVGALLRSVKK  
>32 mouse\_SCN11A\_repeat1\_sp\_Q9R053  
IRISVH-----SVFSMFIICTVIINC MFMANS-----  
-----SVDSR-PSSNIPEYVFIGIYV  
LEAVIKILARGFIV-----DEFSYLRDPWNWLD FIVIGTAIAPCFLGN-----  
-----KVN-NLSTLRTFRVLRALKAISVI-----SGL-  
KVIVGALLRSVKK  
>33 homo\_SCN11A\_repeat1\_sp\_Q9UI33  
IRVSVH-----SLFSMFIIGTVIINC VF MATGP-----  
-----AKNSNSNNTDIAECVFTGIYI  
FEALIKILARGFIL-----DEFSFLRDPWNWLD SIVIGIAIVSYIPGITI-----  
-----KLLPLRTFRVFRALKAISVV-----SRL-  
KVIVGALLRSVKK  
>34 taeniopygia\_SCN\_repeat1\_gi|224044620|  
IKILVH-----SLFSMFIMCTILTNCVFMAQSE-----  
-----TPSW----NKYVEYTFTGIYT  
FESLIKILARGFCM-----TEFTFLRDPWNWLD FSVIVMAYITEFVDLG-----  
-----NVSALRTFRVLRALKTISVI-----SGL-  
KTIVGALIQSVKK  
>35 homo\_SCN4A\_repeat1\_sp\_P35499  
IKVLIH-----ALFSMFIMITILTNCVFMMSD-----  
-----PPPW----SKNVEYTFTGIYT  
FESLIKILARGFCV-----DDFTFLRDPWNWLD FSVIMMAYLTEFVDLG-----  
-----NISALRTFRVLRALKTITVI-----PGL-  
KTIVGALIQSVKK  
>36 rat\_SCN5A\_repeat1\_sp\_P15389  
VKILVH-----SLFSMLIMCTILTNCVFMAQHD-----  
-----PPPW----TKYVEYTFTAIYT  
FESLVKILARGFCL-----HAFTFLRDPWNWLD FSVIVMAYTTEFVDLG-----  
-----NVSALRTFRVLRALKTISVI-----SGL-  
KTIVGALIQSVKK  
>37 rat\_SCN9A\_repeat1\_sp\_O08562  
IKILVH-----SLFSMLIMCTILTNCIFM T LSN-----  
-----PPEW----TKNVEYTFTGIYT  
FESLIKILARGFCV-----GEFTFLRDPWNWLD FVVIVFAYLTEFVNLG-----  
-----NVSALRTFRVLRALKTISVI-----PGL-  
KTIVGALIQSVKK  
>38 rabbit\_SCN9A\_repeat1\_sp\_Q28644  
IKILVH-----SLFSMLIMCTILTNCIFM T MNN-----  
-----PAEW----TKNVEYTFTGIYT  
FESLVKIFARGFCV-----GEFTFLRDPWNWLD FIVIVFAYLTEFVNLG-----  
-----NVSALRTFRVLRALKTISVI-----PGL-  
KTIVGALIQSVKK  
>39 homo\_SNC3A\_repeat1\_sp\_Q9NY46  
IKILVH-----SLFSMLIMCTILTNCVF M T LSN-----  
-----PPDW----TKNVEYTFTGIYT

FESLIKILARGFCL-----EDFTFLRDPWNWLD FSVIVMAYVTEFVSLG-----  
-----NVSALRTFRVLRALKTISVI-----PGL-  
KTIVGALIQSVKK  
>40 canis\_SCN\_repeat1 gi|74004456|  
IKILVH-----SLFNVLIMCTILTNCVFMTMSN-----  
-----PPDW-----TKNVEYFTFTGIYT  
FESLIKILARGFCL-----EDFTFLRDPWNWLD FTVITFAYVTEFVDLG-----  
-----NVSALRTFRVLRALKTISVI-----PGL-  
KTIVGA-----  
>41 danio\_SCN8AA\_repeat1 sp\_Q9DF53  
IKILIH-----SVFSMFIMCTILTNCVFMTFSN-----  
-----PPEW-----SKQVEYFTFTGIYT  
FESAVKIIARGFCI-----DGFTFLRDPWNWLD FFMVISMAYVTEFVDLG-----  
-----NVSALRTFRVLRALKTISVI-----PGL-  
KTIVGALIQSVKK  
>42 mouse\_SCN8A\_repeat1 sp\_Q9WTU3  
IKILIH-----SVFSMIIMCTILTNCVFMTFSN-----  
-----PPEW-----SKNVEYFTFTGIYT  
FESLVKIIARGFCI-----DGFTFLRDPWNWLD FSVIMMAYVTEFVDLG-----  
-----NVSALRTFRVLRALKTISVI-----PGL-  
KTIVGALIQSVKK  
>43 canis\_SCNAA\_repeat1 sp\_Q46669  
IKVSVH-----SWFSLFITVTILVNCVGMTQTE-----  
-----LPD-----RIEYVFTVIYT  
FEALIKILARGFCL-----NEFAYLRDPWDWLD FSVITLAYIGEATALR-----  
-----GISGLRTFRVLRALKTVSVI-----PGL-  
KVIVGALIH SVRK  
>44 homo\_SCN7A\_repeat1 sp\_Q01118  
IKVLVH-----PFFQLFILISVLIDCVFMSLTN-----  
-----LPKW-----RPVLENTLLGIYT  
FEILVKL FARGVWA-----GSFSFLGDPWNWLD FSVTVFEVIIRYSPLD-----  
-----FIPTLQTARTLRILKI IPLN-----QGL-  
KSLVGVL I HCLKQ  
>45 rabbit\_CAC1C\_repeat1 sp\_P15381  
ISIVEW-----KPF EIIILLTIFANCVALAIYIPFPED-----  
-----DSNATNSN-----LERVEYLFLII FT  
VEAFLKVIAYGLLF-----HPNAYLRNGWNLLDFIIVVVGLFSAILEQATK-AD-  
-----GANALGGKGAGF-DVKALRAFRVLRPLRLVSGV-----PSL-  
QVVLNSIIKAMV-  
>46 mouse\_CAC1S\_repeat1 sp\_Q02789  
ISIVEW-----KPFETIILLTIFANCVALAVYLPMPED-----  
-----DNNTLNLG-----LEKLEYFFLIVFS  
IEAAMKIIAYGFLF-----HQDAYLRSGWNVLD FIVFLGVFTVILEQVNI IQT-  
-----NTAPMSSKGAGL-DVKALRAFRVLRPLRLVSGV-----PSL-  
QVVLNSIFKAML-  
>47 mouse\_CAC1F\_repeat1 sp\_Q9JIS7  
ISIVEW-----KPF DILILLTIFANCVALGVYIPFPED-----  
-----DSNTANHN-----LEQVEYVFLVI FT  
  
VETVLKIVAYGLVL-----HPSAYIRNGWNLLDFIIVVVGLF SVLLEQGPGRPG-  
-----DAPHTGGKPGGF-DVKALRAFRVLRPLRLVSGV-----PSL-  
HIVVNSIMKALV-  
>48 gallus\_CAC1D\_repeat1 sp\_O73700  
ISLVEW-----KPF DIFILLSIFANCVALAVYIPFPED-----  
-----DSNSTNHN-----LEKVEYAFLLII FT  
VETFLKIIAYGLLL-----HPNAYVRNGWNLLDFVIVVVGLF SVILEQLTKETE-  
-----GGSHSGGKPGGF-DVKALRAFRVLRPLRLVSGV-----PSL-  
QVVLNSIIKAMV-  
>49 homo\_CACN\_repeat1 gi|193788728|  
ISIVEW-----KPF EIIILLTIFANCVALAIYIPFPED-----  
-----DSNATNSN-----LERVEYLFLII FT

VEAFKVIAYGLLF-----HPNAYLRNGWNLDFIIVVVGLFSAILEQATKADG-  
 -----ANALGGKGAGF-DVKALRAFRVLRPLRLVSGV-----PSL-  
 QVVLNSIIKAMVP  
 >50 drosophila\_CAC1D\_repeat1 sp\_Q24270  
 IRIVEW-----KPFEFLLILTIFANCIALAVYTPYPGS-----  
 -----DSNVTNQT----LEKVEYVFLVIIFT  
 AECVMKILAYGFVL-----HNGAYLRNGWNLDFIIVVIGAISTALSQLMK----  
 -----DAF-DVKALRAFRVLRPLRLVSGV-----PSL-  
 QVVLNSILKAMV-  
 >51 homo\_CAC1A\_repeat1 sp\_O00555  
 KKITEW-----PPFEYMILATIIANCIIVLALAQHLPDD-----  
 -----DKTPMSER----LDDTEPYFIGIFC  
 FEAGIKIIALGFAP-----HKGSYLRNGWNVMDFVVVLTGILATVGTEF-----  
 -----DLRTLRAVRVLRPLKLVSGI-----PSL-  
 QVVLKSIMKAMIP  
 >52 homo\_CAC1B\_repeat1 sp\_Q00975  
 KRITEW-----PPFEYMILATIIANCIIVLALAQHLPDG-----  
 -----DKTPMSER----LDDTEPYFIGIFC  
 FEAGIKIIALGFVF-----HKGSYLRNGWNVMDFVVVLTGILATAGTDF-----  
 -----DLRTLRAVRVLRPLKLVSGI-----PSL-  
 QVVLKSIMKAMV-  
 >53 rat\_SCN11A\_repeat3 sp\_O88457  
 YQIVKH-----SWFESFIIIFVILLSSGALIFEDVNLPS-----  
 -----RPQVEKL----LRCTDNIFTFIFL  
 LEMILKWVAFGF-----RRYFTSAWCWLDLIVVVSVLSLMNLP-----  
 -----SLKSFRTLRLRPLRALSQF-----EGM-  
 KVVVYALISAIPA  
 >54 mouse\_SCN11A\_repeat3 sp\_Q9R053  
 YQIVKH-----SWFESFIIIFVILLSSGALIFEDVNLPS-----  
 -----RPQVEKL----LKCTDNIFTFIFL  
 LEMILKWVAFGF-----RKYFTSAWCWLDLIVVVSVLSLTNLP-----  
 -----NLKSFRTLRLRPLRALSQF-----EGM-  
 KVVVNALMSAIPA  
 >55 rat\_SCN9A\_repeat3 sp\_O08562  
 YRIVEH-----SWFESFIVLMILLSSGALAFEDIYIEK-----  
 -----KKTIIKII----LEYADKIFTYIFI  
 LEMLLKWVAYGY-----KTYFTNAWCWLDLIVDVSLVTLVANTLGYSDLG  
 -----PIKSLRTLRLRPLRALSFR-----EGM-  
 RVVVNALIGAIPS  
 >56 rabbit\_SCN9A\_repeat3 sp\_Q28644  
 YRIVEH-----SWFESFIVLMILLSSGALAFEDIYIEK-----  
 -----KKTIIKII----LEYADKIFTYIFI  
 LEMLLKWVAYGY-----KTYFTNAWCWLDLIVDVSLVTLVANTLGYSDLG  
 -----PIKSLRTLRLRPLRALSFR-----EGM-  
 RVVVNALIGAIPS  
 >57 mouse\_SCN9A\_repeat3 uniprot\_B7ZWN  
 YRIVEH-----SWFESFIVLMILLSSGALAFEDIYIEK-----  
 -----KKTIIKII----LEYADKIFTYIFI  
 LEMLLKWVAYGY-----KTYFTNAWCWLDLIVDVSLVTLVANTLGYSDLG  
 -----PIKSLRTLRLRPLRALSFR-----EGM-  
 RVVVNALIGAIPS  
 >58 mouse\_KCNH1 sp\_Q60603  
 -----TWDWIILILTFYTAILVPYNVFSK-----  
 -----TRQNNVA----WLVDIVDVIFL  
 VDIVLNFHTTFVGPAGEVISDPKLIRMNYLK-TWFVIDLLSCLPYDVINAFENVDEVSFAF  
 MGDPGKIGFADQIPPLEGRESQGISSLFS-SLKVVRLRLRGRVARKLDHY-----IEY-  
 GAAVLV-----  
 >59 mouse\_KCNH8 sp\_P59111  
 -----GWDWLILLATFYVAVTVPYNVCFIGN-----  
 -----EDLSTTRS----TTVSDIAVEILFI  
 IDIILNFRTTYVSKSGQVIFEARSICIHVVT-TWFIIDLIALPFDLLYAFNVTV-----

-----VSLVH-LLKTVRLLRLLRLLQKLDRY-----SQH-  
STIVLTLLMSM--  
>60 homo\_KCNH3 sp\_Q9ULD8  
-----TWDFGILLATLYVAVTVPVYVVCVSTA-----  
-----REPSAARGP----PSVCDLAVEVLF  
LDIVLNFRTTFVSKSGQVVFAPKSI  
CLHYVT-TWFLLDVIAALPFDLLHAFKVN  
V-----  
-----YFGAH-LLKTVRLLRLLRLLPRLDRY-----SQY-  
SAVVL-----  
>61 homo\_CAC1G\_repeat4 sp\_O43497  
HHLCTS-----HYLDLFI  
TGVI  
GLNVVTMAMEHYQQ-----  
-----PQILDEA----LKICNYIFTVIFV  
LESVFKLVAFG-----FRRFFQDRWNQDLAIVLLS  
SIMGITLEEIEVNA-----  
-----SLPINPT-IIRIMRVLRIARVLKLLKMA-----VGM-  
RALLDTVMQALPQ  
>62 mouse\_SCN11A\_repeat4 sp\_Q9R053  
FDLVTS-----QVFDV  
IILGLIVTNMIIMMAESE  
GQ-----  
-----PNEVKKI----FDILNIVFVVI  
FTVECLIKVFALR-----QHYFTNGWNL  
FDCV  
VVVLSIISTLVSGLENSN-----  
-----VFPPT-LFRIVRLARIGRILRLVRAA-----RGI-  
RTLLFALMMSLPS  
>63 rat\_SCN9A\_repeat4 sp\_O08562  
FDLVTN-----QAFDITIMVLI  
CLNMVTMMVEKEGQ-----  
-----TEYMDYV----LHWINMVFIILFT  
GECVLKLLISLR-----HYYFTVGWNI  
FDFV  
VVVLSIVGMFLAEMIEKY-----  
-----FVSPT-LFRVIRLARIGRILRLIKGA-----KGI-  
RTLLFALMMSLPA  
>64 rat\_SCN11A\_repeat4 sp\_O88457  
FDLVTS-----QVFDV  
IILGLIVLNMIMMAESADQ-----  
-----PKDVKKT----FDILNIAFVVI  
FTIECLIKVFALR-----QHYFTNGWNL  
FDCV  
VVVLSIISTLVSRLEDSN-----  
-----ISFPPT-LFRVVRLARIGRILRLVRAA-----RGI-  
RTLLFALMMSLPS  
>65 humo\_CAC1G\_repeat2 sp\_O43497  
RKIVDS-----KYFGRGIMIAI  
LVNTLSMGI  
EYHEQ-----  
-----PEELTNA----LEISNIVFTSLFA  
LEMLLKLLVYG-----PFGYIKNPYNI  
FDGVI  
VVVISVWEIVGQQGG-----  
-----GLSVLRTFRLMRVLKLVRF-----PAL-  
QRQLVVLMTMDN  
>66 homo\_CACNA1E\_repeat\_4 sp\_Q15878  
WHFVVS-----PSFEYTIMAMIALNTV  
VLMKYYSA-----  
-----PCTYELA----LKYLNIAFTMVFS  
LECVLKVIAFG-----FLNYFRD  
TWNIFDFITVIGSITEI  
ILTD  
SKLVN-----  
-----TSGF-NMSFLKLFRAARLIKLLRQ  
G-----YTI-  
RILLWTFVQSFKA  
>67 drosophila\_CAC1A\_repeat\_4 sp\_P91645  
WRIVVS-----TPFEYFIMMLIVFNT  
LLLMKYHNQ-----  
-----GDMYEKS----LKYINMGFTGMFS  
VETVLKIIGFG-----VKNFFKDPWNI  
FDLITV  
LGSIVDALWMEFGHDD-----  
-----SNSI-NVGFLRLFRAARLIKLLRQ  
G-----YTI-  
RILLWT-----  
>68 homo\_KCNV2 sp\_Q8TDN2  
WNLMEKPFSSVA  
AKAIGVASSTFVLVSVVALALNTVEEMQ-----  
-----QHSG  
-----QEGE----GPDLRPI----LEHVEMLCMGFFT  
LEYLLRLASTP-----DLRRFARSALN  
LVDLVAILPLYLQ  
LLECF  
TGE  
GHQ-----  
-----RGQTVGSVGVKVGQ-VLRVMRLMRIFRILKLARHS-----TGL-  
RAFGFTLRQCYQQ  
>69 homo\_KCNF1 sp\_Q9H3M0\_KCNF1  
WKFLEKPESSCPARVVA  
VLSFLLI  
LVSSVVMCMGTIPELQ-----  
-----VLD-  
-----AEG----NRVEHPT----LENVETACIGWFT  
LEYLLRLFSSP-----NKLHFALS  
FMNIVD  
VLAILPFYVSLTLTHL  
GAR-----  
-----MMELTNVQQ-AVQALRIMRIARIFKLARHS-----SGL-



QTLTYALKRSFKE  
 >70 homo\_KCNB1 sp\_Q14721  
 WDLLEKPNSSVAAKILAIISIMFIVLSTIALSLNLTPELQ-----SLD-  
 -----EFG----QSTDNPQ----LAHVEAVCIAWFT  
 MEYLLRFLSSP-----KKWKFFKGPLNAIDLLAILPYYVTIFLTESNKS---  
 -----VLQFQNVRR-VVQIFRIMRILRILKLARHS-----TGL-  
 QSLGFTLRRSYNE  
 >71 canis\_KCNB2 sp\_Q95167  
 RDLLEKPNSSVAAKILAIIVSNLFIVLSTIALSLNLTPELQ-----EMD-  
 -----EFG----QPNDNPQ----LAHVEAVCNAWFT  
 MEYLLRFLSSP-----NKWKFFKGPLNVIDLLAILPYYVTIFLTESNKS---  
 -----VLQFQNVRR-VVQIFRIMRILRILKLARHS-----TGL-  
 QSLGFTLRRSYNE  
 >72 drosophila\_KCNAB sp\_P17970  
 WELLEKPNTSFAARVIAVISILFIVLSTIALTLNLTLPQLQ-----HIDN  
 G-----TPQDNPQ----LAMVEAVCITWFT  
 LEYILRFSASP-----DKWKFFKGGLNIIDLLAILPYFVSLFLETNKN---  
 -----ATDQFQDVRV-VVQVFRIMRILRVLKLARHS-----TGL-  
 QSLGFTLRNSYKE  
 >73 pongo\_KCNV1 sp\_Q5RC10  
 WNILEKPGSSSTAARIFGVISIIIFVVVSIINMALMSAEL-----  
 -----SWLDLQL----LEILEYVCISWFT  
 GEFVLRFLCVR-----DRCRFLRKVPNIIDLLAILPFYITLLVESLSGSQ--  
 -----TTQELENVGR-IVQVLRLLRMLKLGRHS-----TGL-  
 RSLGMTITQCYEE  
 >74 homo\_KCNS3 sp\_Q9BQ31  
 WIRMENPAYCLSAKLIAISSLSVVLASIVAMCVHSMSEFQ-----NED-  
 -----GEVDDPV----LEGVEIACIAWFT  
 GELAVRLAAAP-----CQKKFWKNPLNIIDFVSIIPFYATLAVDTKEEE---  
 -----SEDIENMGK-VVQILRLMRIFRILKLARHS-----VGL-  
 RSLGATLRHSYHE  
 >75 squirrelmonkey\_KCNS1 sp\_A4K2X4  
 WLTMENPGYSLPSKLFSCVSIISVVLASIAAMCIHSLPEYQ-----AREA  
 AAAVA-----AVAAGRSAE----GVRDDPV----LRRLEYFCIAWFS  
 FEVSSRLLLAP-----STRNFFCHPLNLIIDIVSVLPFYLTLLAGAALGDQG-  
 -----GTGGKEFGHLGK-VVQVFRMLRIFRVLKLARHS-----TGL-  
 RSLGATLKHYSYRE  
 >76 gallus\_KCNG2 sp\_073606  
 RDMVENPHSGIPGKIFACISISFVAITAVSLCISTMPDVR-----EEE-  
 -----DRGE----CSQKCYD----IFVLETVCVAVWS  
 FEFLLRISIQAE-----NKCAFLKTPLNIIIDILAILPFYISLIVDMASKNNS  
 KP-----GGGAGNKYLERVGL-VLRFLRALRILYVMRLARHS-----LGL-  
 QTLGLTVRRCTRE  
 >77 homo\_KCNG4 sp\_Q8TDN1  
 REMVENPQSGLPKVFACLSILFVATTAVSLCVSTMPDLR-----AEE-  
 -----DQGE----CSRKCY----IFIVETICVAVWS  
 LEFCLRFVQAQ-----DKCQFFQGPLNIIDILAI SPYYVSLAVSEPPEDGE  
 -----RPSGSSYLEKVGL-VLRVLRALRILYVMRLARHS-----LGL-  
 QTLGLTVRRCTRE  
 >78 rat\_KCNC3 sp\_Q01956\_KCNC3  
 WALFEDPYSSRAARYVAFASLFFILISITTFCLETHEGFI-----HISN  
 KTVTQASP-----IPGAPPENITNV----EVETEPF----LTYVEGVCVWVFT  
 FEFLMRVTFCP-----DKVEFLKSSLNIIDCVAILPFYLEVGLSGLSSK---  
 -----AAKDVLG-FLRVVRFVRILRIFKLTRHF-----VGL-  
 RVLGHTLRASTNE  
 >79 homo\_KCNC2 sp\_Q96PR1  
 WALFEDPYSSRAARFIAFASLFFILVSIITTFCLETHEAFN-----IVKN  
 KTEPV-----INGTSVVLQY----EIETDPA----LTYVEGVCVWVFT  
 FEFLVRIVFSP-----NKLEFIKNLLNIIDFVAILPFYLEVGLSGLSSK---  
 -----AAKDVLG-FLRVVRFVRILRIFKLTRHF-----VGL-  
 RVLGHTLRASTNE

>80 drosophila\_KCNAW sp\_P17972  
WSLFDEPYSSNAAKTIGVVSVFFICISILSFCLKTHPDMR-----VPIV  
RNITVKT-----ANGSNGWFLDKT----QTNAHIA----FFYIECVNAWFT  
FEILVRFISSP-----NKWEFIKSSVNIIDYIATLSFYIDLVLQRFAS----  
-----HLENAD-ILEFFSIIRIMRLFKLTRHS-----SGL-  
KILIQTFRASAKE  
>81 homo\_KCNA1 sp\_Q09470  
WLLFEYPESSGPARGIAIVSVMVILISIVIFCLETLPELK-----DDKD  
F----TGT-----VHRIDNTTVIYN-----SNIFTDP----FFIVETLCIIWFS  
FELVVRFFACP-----SKTDFFRNIMNFIDIVAIIPYFITLGTETIAEQE-G-  
-----NQGEGQATSLA-ILRVIRLVRVFRIFKLSRHS-----KGL-  
QILGQTLKASMRE  
>82 rat\_KNCA6 sp\_P17659  
WLLFEYPESSGPARGIAIVSVLVILISIVIFCLETLQPFRADGRGGSNEGSGTRMSPASR  
GSHEEEDDEDSDYAFPGSIPSGGLGTGGTSSFFSTLGGSFFTDP----FFLVETLCIVWFT  
FELLVRFSAACP-----SKAAFFRNIMNIIDLVAIFPYFITLGTETLVQRHEQQ  
PV-----SGGSGQNROQAMSLA-ILRVIRLVRVFRIFKLSRHS-----KGL-  
QILGKTLQASMRE  
>83 homo\_KCNA5 sp\_P22460  
WLIFEYPESSGSARAIIVSVLVILISIIITFCLETLPEFRDEREL-----LRHPPAPHQ  
PPAPAPGANGS-----GVMAPPSGPTVAPLL----PRTLADP----FFIVETTCVIWFT  
FELLVRFSAACP-----SKAGFSRNIMNIIDVVAIFPYFITLGTETLAEQQPGG  
G-----GGGQNGQQAMSLA-ILRVIRLVRVFRIFKLSRHS-----KGL-  
QILGKTLQASMRE  
>84 rat\_KCNA3 sp\_P15384  
WLLFEYPESSGPARGIAIVSVLVILISIVIFCLETLPEFR-----DEKD  
YPASPSQDV-----FEAANNSTSGASSG----ASSFSDP----FFVETLCIIWFS  
FELLVRFSAACP-----SKATFSRNIMNLIDIVAIIPYFITLGTETLAERQ---  
-----GNGQQAMSLA-ILRVIRLVRVFRIFKLSRHS-----KGL-  
QILGQTLKASMRE  
>85 canis\_Kv1.3 gi|57088651|  
WLLFEYPESSGPARGIAIVSVLVILISIVIFCLETLPEFR-----DDKD  
YAAAAQEQ-----PEAARNGTSGPPA----AAGFADP----FFVETLCIIWFS  
FELLVRFSAACP-----SKATFSRNIMNLIDIVAIIPYFITLGTETLAERQ---  
-----GNGQQAMSLA-ILRVIRLVRVFRIFKLSRHS-----KGL-  
QILGQTLKASMRE  
>86 bovine\_KCNA4 sp\_Q05037  
WLLFEYPESSSPARGIAIVSVLVILISIVIFCLETLPEFR-----DDR  
LIMALSTGGHG-----GLLNDTSAPHPENSG----HTIFNDP----FFIVETVCIVWFS  
FEFVVRFCFACP-----SQALFFKNIMNIIDIVSILPYFITLGTDLAQQQGG-  
-----GNGQQQQAMSF A-ILRIIRLVRVFRIFKLSRHS-----KGL-  
QILGHTLRASMRE  
>87 homo\_KCA10 sp\_Q16322  
WLLFEYPESSSAARAVAVSVLVVVISITIFCLETLPEFR-----EDRE  
LKVVVD-----PNLNMSKTVLS----QTMFTDP----FFMVESTCIVWFT  
FELVLRVFCP-----SKTDFFRNIMNIIDIIISIIIPYFATLITELVQETE--  
-----PSAQQNMSLA-ILRIIRLVRVFRIFKLSRHS-----KGL-  
QILGQTLKASMRE  
>88 rat\_Kv1.2 2R9R\_b\_vs gi|16087779|  
WLLFEYPESSGPARIIAIVSVMVILISIVSFCLETLPIFR-----DENE  
DMHGGGVF-----FHTYSQSTIGYQQ----STSFTDP----FFIVETLCIIWFS  
FEFLVRFSAACP-----SKAGFFTNIMNIIDIVAIIPYVVTI--FLTESN---  
-----KSVLQFQNVRRVQIFRIMRILRIFKLSRHS-----KGL-  
Q-----  
>89 homo\_Kv gi|4826782|  
WLLFEYPESSGPARIIAIVSVMVILISIVSFCLETLPIFR-----DENE  
DMHGGGVF-----FHTYSNSTIGYQQ----STSFTDP----FFIVETLCIIWFS  
FEFLVRFSAACP-----SKAGFFTNIMNIIDIVAIIPYFITLGTETLAEKPED-  
-----AQQGQQAMSLA-ILRVIRLVRVFRIFKLSRHS-----KGL-  
QILGQTLKASMRE  
>90 rat\_Kv pdb:2A79\_chainb

WLLFEYPESGPARIIAIVSVMVILISIVSFCLETLPIFR-----DENE  
DMHGGGVTFHTYSNSTIGYQQ---STSFTDP---FFIVETLCIIWFS  
FEFLVRRFFACPSKAGFFTNIMNIIDIVAIIPYFITLGTLEAEKPED-  
-----AQQGQQAMSLA-ILRVIRLVRVFRIFKLSRHS-----KGL-  
QILGQTLKASMRE

>91 canis\_KCNA2 sp\_Q28293

WLLFEYPESGPARIIAIVSVMVILISIVSFCLETLPIFR-----DENE  
DMHGGGVTFHTYSNSTIGYQQ---STSFTDP---FFIVETLCIIWFS  
FEFLVRRFFACPSKAGFFTNIMNIIDIVAIIPYFITLGTLEAEKPED-  
-----AQQGQQAMSLA-ILRVIRLVRVFRIFKLSRHS-----KGL-  
QILGQTLKASMRE

>92 drosophila shaker\_Kchannel gi|288442|

WLLFEYPESSQAARVVAIISVFVILLSIVIFCLETLPFEFK-----HYKV  
FNNTTNGTKIEEDE---VPDITDP---FFLIETLCIIWFT  
FELTVRFLACPNKLNFCRDVMNVIDIIAIIIPYFITLATVVAEEEDTL  
NLPK-----APVSPQDKSSNQAMSLA-ILRVIRLVRVFRIFKLSRHS-----KGL-  
QILGRTLKASMRE

>93 rabbit\_KCND3 sp\_Q9TTT5

WRAFENPHTSTLALVFYYVTGFFIAVSVITNVVETVPCGT-----VPGS  
-----KELPC---GERYSVA---FFCLDTACVMIFT  
VEYLLRLFAAP-----SRYRFIRSVMSIIDVVAIMPYYIGLVMTNNE-----  
-----DVSG-AFVTLRVFRVFRIFKFSRHS-----QGL-  
RILGYTLKSCASE

>94 hum\_CACNA1E repeat\_2 sp\_Q15878

RHMVKS-----QVFWIVLSLVALNTACVAIVHHNQ-----

-----PQWLTHL---LYYAEFLFLGLFL  
LEMSLKMVGMPRLYFHSSFNCFDFGVTVGSIFEVVAIFRP---  
-----GTSF-GISVLRALRLLRIFKITKYW-----ASL-  
RNLVVSLMSSMKS

>95 drosophila\_CAC1A repeat\_2 sp\_P91645

RHTVKT-----QWFYWFVIVLVFLNTVCVAVEHYGQ-----  
-----PSFLTEF---LYYAEFIFLGLFM  
SEMFIKMYALGPRIYFESSFNRFDCVVISGSIFEVIWSEVK-----  
-----GGSF-GLSVLRALRLLRIFKVTKYW-----SSL-  
RNLVISLLNSMRS

>96 mouse\_SCN11A repeat2 sp\_Q9R053

QTIMTD-----PFTELAITICIIIVNTVFLAMEHHNM-----  
-----DNSLKDI---LKIGNWVFTGIFI  
AEMCLKIIALDPYHYFRHGWNIFDSIVALVSLADVLFHKLSK---  
-----NLSFLASLRVLRVFKLAKSW-----PTL-  
NTLIKIIGHSVGA

>97 rat\_SCN11A repeat2 sp\_O88457

RTIMTD-----PFTELAITICIIINTVFLAVEHHNM-----  
-----DDNLKTI---LKIGNWVFTGIFI  
AEMCLKIIALDPYHYFRHGWNVFDSDIVALVSLADVLYNTL-----  
-----SDN-NRSFLASLRVLRVFKLAKSW-----PTL-  
NTLIKIIGHSVGA

>98 rat\_SCN9A repeat2 sp\_O08562

YFIVMD-----PFVDLAITICIVLNTLFMAMEHHPM-----  
-----TEEFKNV---LAVGNLIFTGIFA  
AEMVLKLIAMD-----PYEYFQVGWNIFDSLIVTSLIE-LFLADVE---  
-----GLSVLRSFRLLRVFKLAKSW-----PTL-  
NMLIKIIGNSVGA

>99 ornitho\_C15orf27 |gi\_149410687|

WQVFLLS-----ASLNSFLVACVILVVILLTLELLIDIK-----LLQ-  
-----FSS---ASQFASV---VHWISLIILSVFF  
TETILRIVVLG-----IWDYIENKIEVFDGAVIILSLAPMVASTVANGP--  
-----SSPWD-AISLIITLRIWRVKRIIDAYVLPVKVEM-

EMVIQQYEKA---  
>100 danio\_c15orf27 |gi\_123703002|  
WQVCLLS-----AGFNCFLVACVILVVLLLTLELLIDTK-----LLQ-  
-----FNN----AFQFACI----IHWISLVILSVFF  
TETVFRIVVLG-----IWDYIENKVEVFDGAVIVLSLAPMVASTVANGP--  
-----SSPWD-AISLIITLRIWRVKRIIDAYVLQVKVEM-  
ELEIQQYEKS---  
>101 monodelphis\_C15orf27 gi|12627230|  
WQVFLLS-----ASLNSFLVACVILVVILLTLELLIDIK-----SLQ-  
-----FSN----SSQFAGV----SHWISLVILSVFF  
SETILRIVVLG-----IWDYIENKIEVFDGAVIILSLAPMVASTIANGP--  
-----SSPWD-AISLTIALRIWRVKRIIDAYVLPVKVEL-  
EMVIQQYEKA---  
>102 sus\_C15orf27 gi|194039682|  
WQVFLLS-----ASVNSFLVACVILVVILLTLELLIDIK-----LLQ-  
-----FSS----AFQFAGV----IHWISLVILSVFF  
SETVLRIVVLG-----IWDYIENKIEVFDGAVIILSLAPMVASTVANGP--  
-----RSPWD-AISLIIMLRIWRVKRVIDAYVLPVKVEM-  
EMVIQQYEKA---  
>103 homo\_C15orf27 |gi\_118442841|  
WQVFLLS-----ASLNSFLVACVILVVILLTLELLIDIK-----LLQ-  
-----FSS----AFQFAGV----IHWISLVILSVFF  
SETVLRIVVLG-----IWDYIENKIEVFDGAVIILSLAPMVASTVANGP--  
-----RSPWD-AISLIIMLRIWRVKRVIDAYVLPVKLEM-  
EMVIQQYEKA---  
>104 pan\_C15orf27 |gi\_114658268|  
WQVFLLS-----ASLNSFLVACVILVVILLTLELLIDIK-----LLQ-  
-----FSS----AFQFAGV----IHWISLVILSVFF  
SETVLRIVVLG-----IWDYIENKIEVFDGAVIILSLAPMVASTVANGP--  
-----RSPWD-AISLIIMLRIWRVKRVIDAYVLPVKLEM-  
EMVIQQYEKA---  
>105 horse\_C15orf27 |gi\_149692210|  
WQVFLLS-----ASLNSFLVACVILVVILLTLELLIDIK-----LLQ-  
-----FSS----AFQFAGV----IHWISLVILSVFF  
SETVLRIVVLG-----IWDYIENKIEVFDGAVIILSLAPMVASTVANGP--  
-----RSPWD-AISLIIMLRIWRVKRVIDAYVLPVKVEM-  
EMVIQQYEKA---  
>106 mus\_C15orf27 gi|27370422|  
WQVFLLS-----ASLNSFLVACVILVVILLTLELLIDTK-----LLQ-  
-----FSN----AFQFAGV----IHWISLVILSVFF  
SETVLRIVVLG-----IWDYIENKIEVFDGAVIILSLAPMVASTVANGP--  
-----RSPWD-AISLIIMFRIWRVKRVIDAYVLPVKLEM-  
EMVTQQYEKA---  
>107 rat\_C15orf27 gi|157817759|  
WQVLLLS-----ASLNSFLVACVILVVILLTLELLIDIK-----LLQ-  
-----FSS----AFQFAAV----IHWISLVILSVFF  
SETILRIVVLG-----IWDYIENKIEVFDGAVIILSLAPMVASTVANGP--  
-----RSPWD-AISLIIMFRIWRVKRVIDAYVLPVKLEM-  
EMVTQQYEKA---  
>108 ciona\_C15orf gi|198433556|  
RKILHS-----VAFYIYILISTFIVTLLLLLAELLIDVG-----VINI  
PSSPDTVVL-----NASALSTLKVQTP----AQKTSTI----LHWISFSFSLSLFF  
IEIMFRLYAWK-----LNIIRSIVSVFDCSIVTMAIATNLAATLAAGS--  
-----TSPFD-AISLLIILRFIRIHSLIQRCVSDSKQEIR  
EKLTKTECS----  
>109 methanococcus hyperpol Kv sp\_Q57603  
KKI-----MEVLSLIFTFEIVASFILSTY-----  
-----NPPYQDL----LIKLDYISIMFFT  
FEFIYNFYVED-----KAKFFKDIYNIVDAIVVIAFLLYSLQVIFY-SKA--  
-----FLGLR-VINLLRILVLLRIIKLRKL-----EEN-  
QALIN-----

>110 ornitho\_vsp gi|149635858|  
-----LT-----TKTEIFGVSLIFVDVALLIVILVTTTSK-----  
-----SIRIPFA-----YRVVSLLIALLFFL  
FDVLLRIFAEG-----FRNYFSIKLNILDAFIVVGTLMIDIVYIYVNTG--  
-----GVKQIPRLAI-LLRPLRIIILIRIFRLAVQK-----KQL-  
EKVTRRMVSENKR  
>111 xenopus\_t\_vsp |gi\_62859843|  
SPFVMS-----FGFRVFGVVLIIIVDFVLVIVDLSVSTQ-----  
-----SSGASTA-----ISSISLSISFFFL  
IDVLLHIFVEG-----FRQYFSSKLNIFDAVIVIVTLLVTLVYAFDFS--  
-----GASNIPRMVN-FLRALRIIILIRILRLASQK-----RQL-  
EKVTRRLVSENKR  
>112 gallus\_vsp gi|118084924|  
SPFVMS-----FGFRVFGVVLIIIVDIIVVIVDLAISEK-----  
-----KRGIREI-----LEGVSLAIALFFL  
VDVLMRVFVEG-----FKNYFRSKLNTLDAVIVVGTLLINMTYSFSDLA--  
-----ATDQMPRMVT-LLRVLRIVILIRIFRLASQK-----KQL-  
EVVTRRMVSENKR  
>113 danio\_vsp gi|70887553|  
TPFVMS-----FGFRVFGVVLIIILDIIMVIVDLSLSEK-----  
-----SRDVGGA-----PETVSLVISFFFL  
IDVLLRVYVEG-----FKVYFSSKLNIVDACIVVITLVVTMIYAFSDFS--  
-----GASLIPRVVT-FLRSLRILILVRIFRLASQK-----REL-  
EKVTRRMVSENKR  
>114 xenopus\_vsp gi|148230800|  
SPFVMS-----FGFRVFGVVLIIIVDFVLVIVDLSVIDK-----  
-----SREATTA-----ISSISLAISFFFL  
IDVLLHIFVEG-----FRQYFSSKLNIFDAAIVIVTLLVTLVYAFDFS--  
-----GATNIPRLVN-FLRGLRIIILVRILRLASQK-----RQL-  
EKVTRRLVSENKR  
>115 rat\_vsp gi|157820295|  
HFLVSS-----VAFRIFGILLIFLDVFLVAIDLHATEK-----  
-----NIYIPLE-----YRAISLAIALFFL  
VDVLLRVYVEG-----RQRYFSDVLTLDVAVVIGVTVLVAVIYTYDKQ--  
-----FLRNIPRLAV-LLRPLRLLILVRILQLAHQK-----RQL-  
EKLTRQLVSGNKR  
>116 mus\_vsp gi|40549440|  
GILVSS-----VAFRIFGIFLVILDVFLVVVDLNVSEK-----  
-----KIYIPLD-----YRSISLAIALFFL  
VDILLRVSVEG-----RRRYFSDVLTLDVAVVIGVTVVVAVIYALYDKH--  
-----FLRDIPRLAV-LLRPLRLLILIRILQLAHQK-----RQL-  
ERLTRKLVSGNKR  
>117 dog\_vsp gi|73993164|  
GSSLVSPGHN---TNNRIFGILLIFVDLSLIITDLLFTER-----  
-----TMHIPLD-----YRSISLAIALFFF  
FDVLLRVYVEG-----IQRYFSDILNYLDAVIVVTLLIDIIYMFYDFK--  
-----FLKTIPRLTI-LFRPLRLIILIRVFHLAHQK-----RHL-  
EMLTRRMVSGNKR  
>118 human\_vsp gi|213972591|  
HSIVSS-----FAFGIFGVFLVLLDVTLLLADLIFTDS-----  
-----KLYIPLE-----YRSISLAIGLFFL  
MDVLLRVFVEG-----RQQYFSDLFNILDTAIIVIPLLVDVIYIFFDIK--  
-----LLRNIPRWTH-LVRLRLRIILIRIFHLLHQK-----RQL-  
EKLMRRLVSENKR  
>119 homo\_vsp\_gamma gi|40549435|  
HSIVSS-----FAFGLFGVFLVLLDVTLILADLIFTDS-----  
-----KLYIPLE-----YRSISLAIALFFL  
MDVLLRVFVER-----RQQYFSDLFNILDTAIIVILLVVDVYIYFFDIK--  
-----LLRNIPRWTH-LLRLLRLIILLRIFHLFHQK-----RQL-  
EKLIRRRVSENKR  
>120 ciona\_vsp gi|76253898|

RAVIDH-----LGMRVFGVFLIFLDIILMIIDLSLPGK-----  
-----SESSQSF----YDGMALALSICYFM  
LDLGLRIFAYG-----PKNFFTNPWEVADGLIIVVTFVVTIFYTVLDEY--  
-----VQE--TGADG-LGRLVVLARLLRVVRLARIF-----YSH-  
QQMKASSRRTISQ  
>121 Aeropyrum\_Kv\_PDB\_1ORS\_c  
-DVMEH-----PLVELGVSYAALLSVIVVVVEYTMQL-----  
-----SGEYLVR----LYLVDLILVIILW  
ADYAYRAYKSG-----DPAGYVKKTLYEIPALV--PAGLLALIEGHLA----  
-----GLGLFRLVRLLRFLRILLII-----SRG-  
SKFLSAIAD----  
>122 homo\_BK\_gi|119574982|  
GVMISA-----QTLTGRVLVVLVVFALSIGALVIYFIDSSN-----  
-----PIESC-----QNFYKDF----TLQIDMAFNVFFL  
LYFGLRFIAAN-----DKLWFVLEVNSVVDFFTVPVVFVSVYLNRSWL----  
-----GLRFLRALRLIQFSEILQF-----L-  
NILKTSN---SIK  
>123 mouse\_BK\_mslo\_gi|4639628|  
GVMISA-----QTLTGRVLVVLVVFALSIGALVIYFIDSSN-----  
-----PIESC-----QNFYKDF----TLQIDMAFNVFFL  
LYFGLRFIAAN-----DKLWFVLEVNSVVDFFTVPVVFVSVYLNRSWL----  
-----GLRFLRALRLIQFSEILQF-----L-  
NILKTSN---SIK

**Supplementary Table S2. Gating kinetics of Asp<sup>112</sup> mutants at pH 5.5//5.5 (mean  $\pm$  s.e. (*n*)).**

|           | $\tau_{\text{act}}$ at 40 mV (s) | $\tau_{\text{act}}$ at 60 mV (s) | $\tau_{\text{act}}$ at 80 mV (s) | $\tau_{\text{tail}}$ (s)                                 |
|-----------|----------------------------------|----------------------------------|----------------------------------|----------------------------------------------------------|
| WT hHv1   | 1.1 $\pm$ 0.4 (7)                | 1.4 $\pm$ 0.6 (4)                |                                  | 0.81 $\pm$ 0.07 (6)                                      |
| D112E     | 0.2 $\pm$ 0.09 (3)               | *0.26 $\pm$ 0.07 (6)             | 0.28 $\pm$ 0.22 (3)              | <sup>†</sup> *6.0 $\pm$ 0.4 (4)<br>0.069 $\pm$ 0.008 (4) |
| D112H     |                                  | 2.78 $\pm$ 0.40 (8)              | 1.19 $\pm$ 0.37 (4)              | 0.69 $\pm$ 0.06 (14)                                     |
| D112S     |                                  | 2.76 $\pm$ 0.41 (9)              | 1.17 $\pm$ 0.17 (5)              | *3.35 $\pm$ 0.25 (15)                                    |
| D112A/A/A |                                  | 3.03 $\pm$ 0.99 (4)              | 2.47 $\pm$ 0.18 (4)              | *2.46 $\pm$ 0.23 (8)                                     |
| D112N/A/A |                                  | 3.36 $\pm$ 0.57 (7)              | 1.73 $\pm$ 0.07 (5)              | *2.46 $\pm$ 0.21 (7)                                     |
| D112K/A/A |                                  | 1.06 $\pm$ 0.19 (3)              | 1.46 $\pm$ 0.29 (6)              | *0.18 $\pm$ 0.03 (7)                                     |
| D112F/A/A |                                  | 2.22 $\pm$ 0.03 (3)              | 1.67 $\pm$ 0.23 (8)              | *0.028 $\pm$ 0.0005 (6)                                  |

Mean  $\pm$  s.e. (*n*) values of  $\tau_{\text{act}}$  at several voltages 5 and  $\tau_{\text{tail}}$  at -40 mV, all at pH 5.5//5.5 at room temperature (21°C). Because the  $g_{\text{H}}-V$  relationship was shifted positively in most D112x mutants, as reported previously<sup>1</sup>, fittable currents were not present at all voltages. <sup>†</sup>Tail currents in D112E had two components that were measured at -60 mV, because at -40 mV channel closing was impracticably slow. For all mutants  $\tau_{\text{tail}}$  differed significantly from WT ( $p < 0.0001$ ) by Student's t-test. The time constant of activation ( $\tau_{\text{act}}$ ) of proton current during depolarizing pulses to +60 mV was obtained by fitting the current with a single rising exponential. The deactivation (channel closing, tail current) time constant ( $\tau_{\text{tail}}$ ) was obtained by fitting the tail current upon repolarization to a single decaying exponential. The D112E mutant had fast and slow components of tail current decay; we give the time constant of the dominant slower component. \*Differs significantly from WT at  $p < 0.05$  ( $\tau_{\text{act}}$ ) by Student's t-test.

#### References

1. Ramsey, I. S. *et al.* An aqueous H<sup>+</sup> permeation pathway in the voltage-gated proton channel Hv1. *Nat. Struct. Mol. Biol.* **17**, 869-875 (2010).

**Supplementary Table S3. Comparison of relative permeability values obtained from the GHK equation assuming OH<sup>-</sup> or H<sup>+</sup> permeation in D112x mutants.**

|                      | $V_{\text{rev}}$ pH<br>7.0 (mV) | $V_{\text{rev}}$ pH 5.5<br>Cl <sup>-</sup> (mV) | $P_{\text{CH}_3\text{SO}_3}/P_{\text{Cl}}$<br>( $P_{\text{H}} = 0$ ) | $P_{\text{OH}}/P_{\text{Cl}}$<br>( $P_{\text{H}} = 0$ ) | $P_{\text{CH}_3\text{SO}_3}/P_{\text{Cl}}$<br>( $P_{\text{OH}} = 0$ ) | $P_{\text{H}}/P_{\text{Cl}}$<br>( $P_{\text{OH}} = 0$ ) |
|----------------------|---------------------------------|-------------------------------------------------|----------------------------------------------------------------------|---------------------------------------------------------|-----------------------------------------------------------------------|---------------------------------------------------------|
| WT hH <sub>v</sub> 1 | -80.9                           | -0.3                                            | -                                                                    | -                                                       | -                                                                     | -                                                       |
| D112E                | -80.7                           | -0.1                                            | -                                                                    | -                                                       | -                                                                     | -                                                       |
| D112H                | -58.4                           | -37.5                                           | 0.14                                                                 | $3.0 \times 10^6$                                       | 0                                                                     | $1.6 \times 10^4$                                       |
| D112K                | -51.7                           | -20.6                                           | 0.35                                                                 | $4.6 \times 10^6$                                       | 0.04                                                                  | $2.6 \times 10^4$                                       |
| D112N                | -12.5                           | -33.1                                           | 0.23                                                                 | $0.3 \times 10^6$                                       | 0.13                                                                  | $0.5 \times 10^4$                                       |
| D112S                | -25.9                           | -40.8                                           | 0.15                                                                 | $0.5 \times 10^6$                                       | 0.04                                                                  | $0.6 \times 10^4$                                       |
| D112A                | -33.8                           | -28.8                                           | 0.27                                                                 | $1.4 \times 10^6$                                       | 0.07                                                                  | $1.3 \times 10^4$                                       |
| D112F                | -36.4                           | -33.5                                           | 0.20                                                                 | $1.2 \times 10^6$                                       | 0.04                                                                  | $1.1 \times 10^4$                                       |

Column 2 is the mean change in  $V_{\text{rev}}$  when pH<sub>o</sub> was changed from 5.5 to 7.0, in CH<sub>3</sub>SO<sub>3</sub><sup>-</sup> solutions (Fig. 2b). The third column is the change in  $V_{\text{rev}}$  measured when Cl<sup>-</sup> replaced CH<sub>3</sub>SO<sub>3</sub><sup>-</sup> at pH<sub>o</sub> 5.5 (Fig. 3g). Columns 4 and 5 show  $P_{\text{CH}_3\text{SO}_3}/P_{\text{Cl}}$  and  $P_{\text{OH}}/P_{\text{Cl}}$  values obtained from the GHK equation (Eq. 1) by fitting the data in columns 2 and 3, assuming that the shift in  $V_{\text{rev}}$  in Column 2 is due mainly to OH<sup>-</sup> permeation ( $P_{\text{H}} = 0$ ). Columns 6 and 7 show analogous results, but assuming that the shift in  $V_{\text{rev}}$  in Column 2 is due mainly to H<sup>+</sup> permeation ( $P_{\text{OH}} = 0$ ).

Although the data can be fitted assuming that either H<sup>+</sup> or OH<sup>-</sup> is permeant, distinct predictions apply to sucrose dilution experiments at different pH<sub>o</sub>. Sucrose effects should be larger at pH<sub>o</sub> 5.5 than 7.0 if OH<sup>-</sup> is permeant, because [OH<sup>-</sup>] is 32 times larger at pH<sub>o</sub> 7.0, and [OH<sup>-</sup>] remains constant as other anions are diluted. The term  $P_{\text{OH}}[\text{OH}^-]_o$  (in Eq. 1) will have a greater effect on  $V_{\text{rev}}$  at pH<sub>o</sub> 7.0, and because  $E_{\text{OH}}$  does not change,  $V_{\text{rev}}$  will change less.



Consistent with  $\text{OH}^-$  permeability, sucrose produced a larger shift of  $V_{\text{rev}}$  at  $\text{pH}_o$  5.5 than at  $\text{pH}_o$  7.0 for all mutants except D112K (Fig. 3e & 3f). By similar reasoning, substituting  $\text{Cl}^-$  for  $\text{CH}_3\text{SO}_3^-$  should shift  $V_{\text{rev}}$  more at  $\text{pH}_o$  5.5 than at  $\text{pH}_o$  7.0 if  $\text{OH}^-$  is permeant. Fig. 3g shows that this occurred in all six anion selective mutants. The data consistently point to a high  $\text{OH}^-$  permeability in D112x mutants.

Outward  $\text{H}^+$  flux and inward  $\text{OH}^-$  flux both likely occur by a Grotthuss mechanism in a single-file channel, a more efficient permeation mechanism than diffusion used by other ions.  $\text{H}^+$  moves in water by hopping from  $\text{H}_3\text{O}^+$  to  $\text{H}_2\text{O}$ , whereas  $\text{OH}^-$  conduction occurs when  $\text{OH}^-$  extracts a proton from a nearby  $\text{H}_2\text{O}$ . The latter process involves proton transfer between neutral and negatively charged species, and thus seems more probable for an anion selective channel. Although we cannot rule out the possibility that  $\text{H}^+$  carries some current, the sucrose dilution results indicate a distinct preference for anions, suggesting that  $\text{OH}^-$  permeation is more likely than  $\text{H}^+$  permeation in the D112x mutant channels.

That WT  $\text{hH}_v1$  conducts  $\text{H}^+$  rather than  $\text{OH}^-$  is based mainly on the unitary conductance increasing at low  $\text{pH}_i$ . Lowering  $\text{pH}_i$  from 6.5 to 5.5 to 5.0 to 4.1 increased the conductance from 37 to 139 to 220 to 400 pS, respectively<sup>1</sup>. In contrast, changing  $\text{pH}_o$  from 7.5 to 6.5 had no effect. These results are consistent with increased conductance by increasing permeant ion concentration  $[\text{H}^+]$  on the proximal side of the membrane. That deuterium reduced the conductance by 50% also supports  $\text{H}^+$  permeation<sup>2</sup> through WT  $\text{H}_v1$  channels.

#### References

1. Cherny, V. V., Murphy, R., Sokolov, V., Levis, R. A. & DeCoursey, T. E. Properties of single voltage-gated proton channels in human eosinophils estimated by noise analysis and by direct measurement. *J Gen Physiol* **121**, 615-28 (2003).
2. DeCoursey, T. E. & Cherny, V. V. Deuterium isotope effects on permeation and gating of proton channels in rat alveolar epithelium. *J Gen Physiol* **109**, 415-34 (1997).

**Supplementary Table S4. Monovalent cation substitution does not change  $V_{\text{rev}}$  in anion selective Asp<sup>112</sup> mutant channels.**

| <b>Mutant</b> | <b>Ion</b>        | <b>Raw <math>\Delta V_{\text{rev}}</math><br/>(mV)</b> | <b><math>V_{\text{jet}}</math> correction<br/>(mV)</b> | <b>Corrected<br/><math>\Delta V_{\text{rev}}</math> (mV)</b> |
|---------------|-------------------|--------------------------------------------------------|--------------------------------------------------------|--------------------------------------------------------------|
| Various       | Na <sup>+</sup>   | +0.5 ± 0.6 (6)                                         | +1.3                                                   | +1.8                                                         |
| D112N/A/A     | Na <sup>+</sup>   | -1.8 ± 0.6 (4)                                         | +1.3                                                   | -0.5                                                         |
| D112N/A/A     | TEA <sup>+</sup>  | +1.8 ± 0.6 (6)                                         | -3.4                                                   | -1.6                                                         |
| D112N/A/A     | K <sup>+</sup>    | -5.3 ± 1.7 (4)                                         | +4.8                                                   | -0.5                                                         |
| D112N/A/A     | NMDG <sup>+</sup> | +6.6 ± 0.6 (4)                                         | -6.0                                                   | +0.6                                                         |

Mean ± s.e. (*n*) values of the change in  $V_{\text{rev}}$  relative to standard TMA<sup>+</sup> solution, when TMA<sup>+</sup> was replaced by the indicated cation (all at ~130 mM), all at pH 5.5//5.5 at room temperature (21°C). TEA<sup>+</sup> is tetraethylammonium<sup>+</sup>, NMDG<sup>+</sup> is N-methyl-D-glucamine<sup>+</sup>. Many COS-7 cells had endogenous K<sup>+</sup> conductances that prevented  $V_{\text{rev}}$  measurement. “Various” includes 1 D112H, 1 D112A, 1 D112S, and 3 D112N/D185M cells. The raw measured values are given (column 2), the correction for measured liquid junction potential differences (Column 3), and the corrected  $V_{\text{rev}}$  values (Column 4). The net values are of the same magnitude as the junction potential corrections, and well within the error of the measurements.
